# Supplementary material
Source: publisher figshare collection journal article supplement (https://gsajournals.figshare.com/articles/dataset/_/14216987)
Supplement: Supplementary file 1 [file 3]

LG1

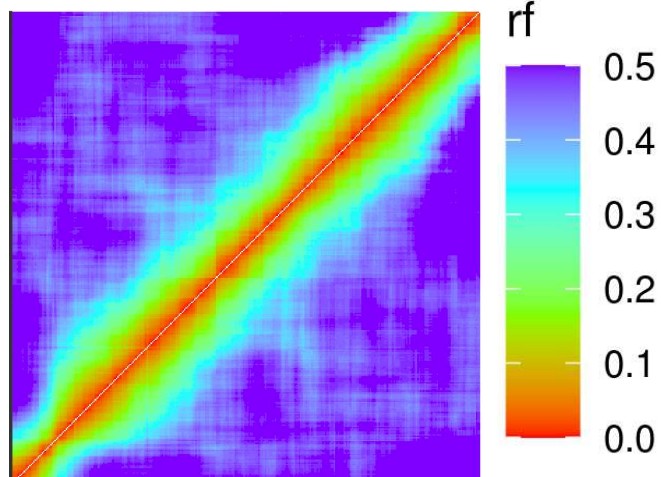

LG1

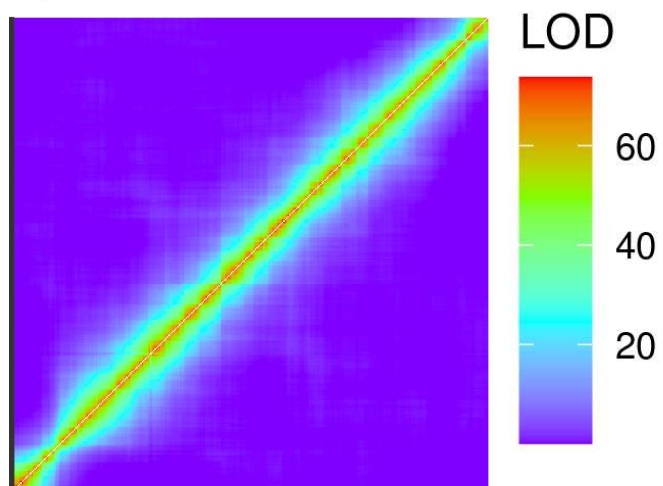

LG2

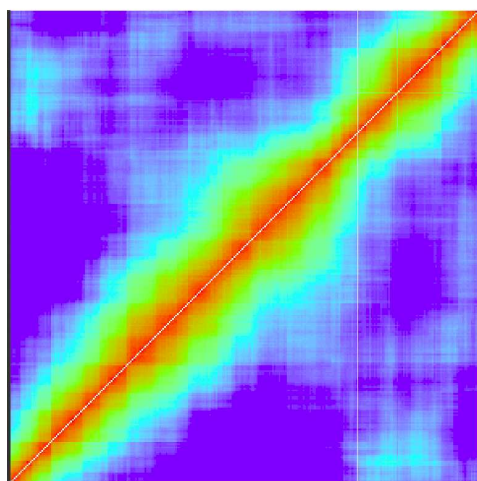

LG2

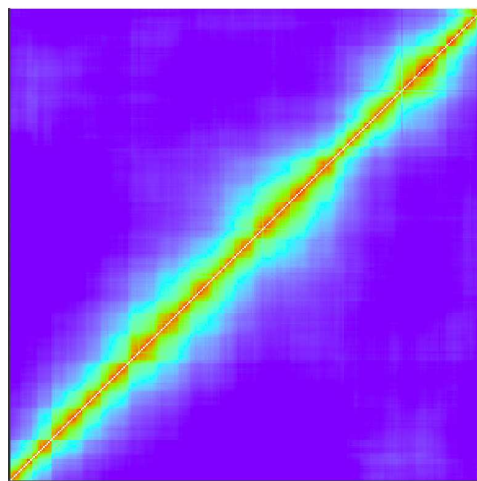

LG3

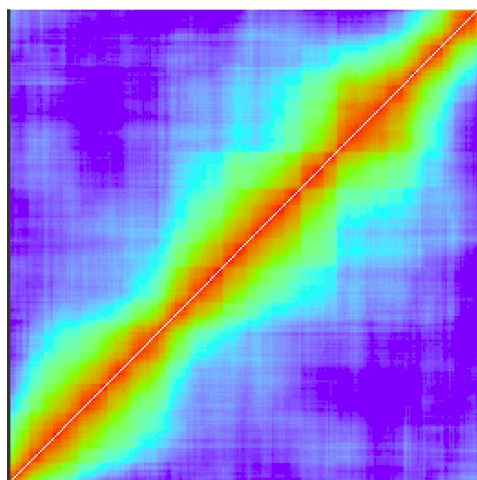

LG3

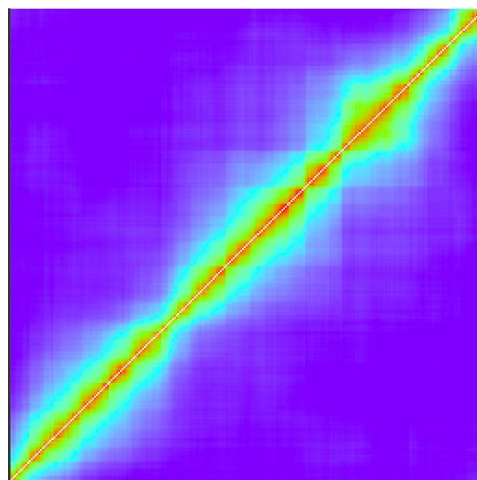

LG4

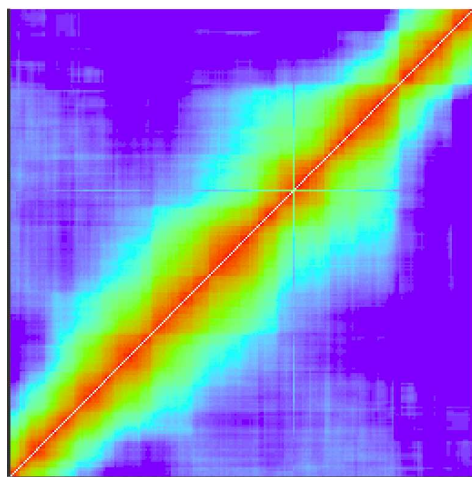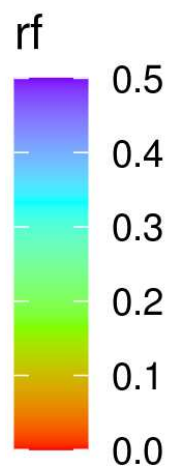

LG4

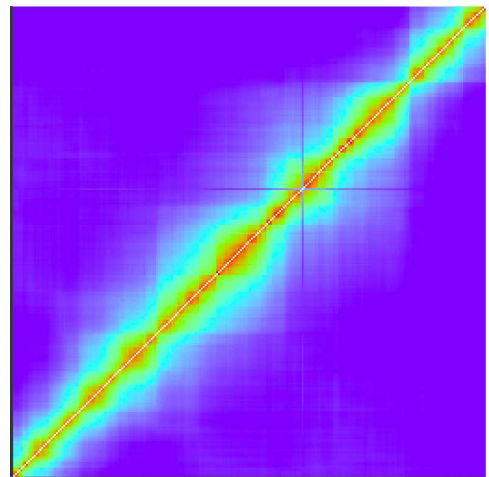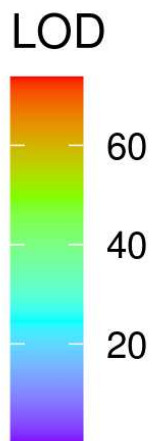

LG5

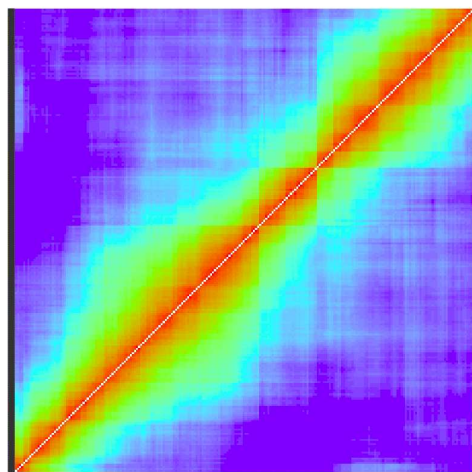

LG5

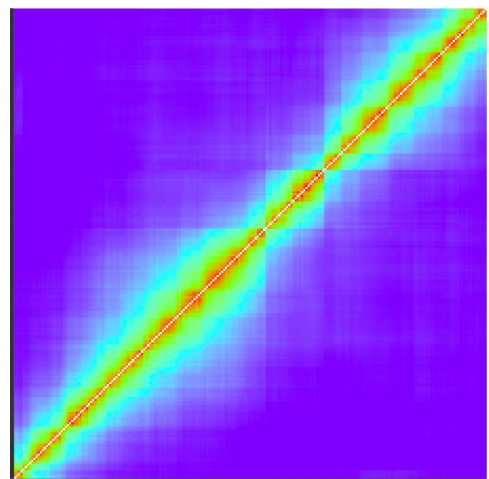

LG6

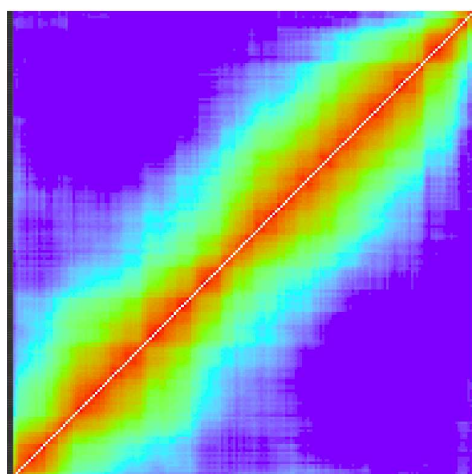

LG6

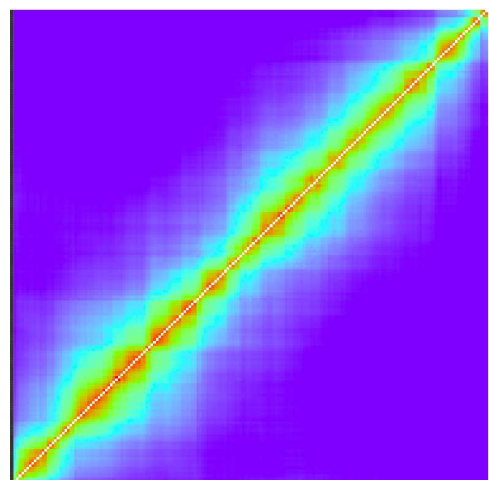

LG7

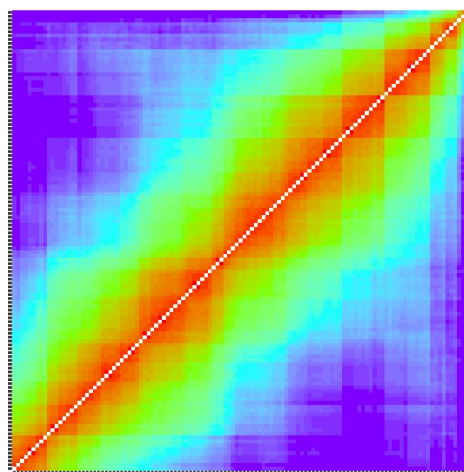

rf

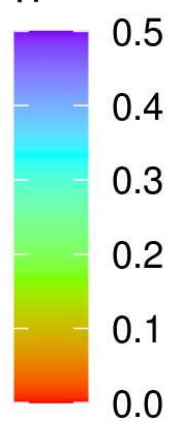

LG7

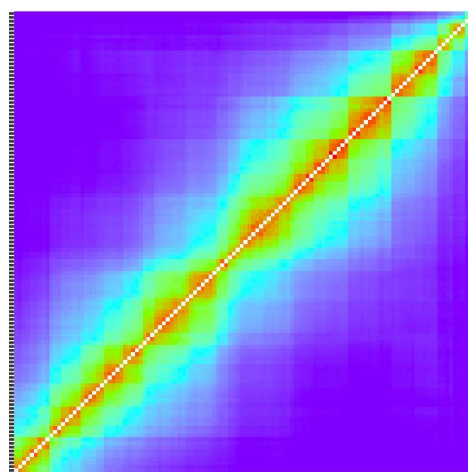

LOD

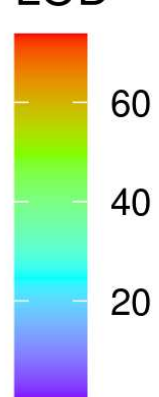

LG8

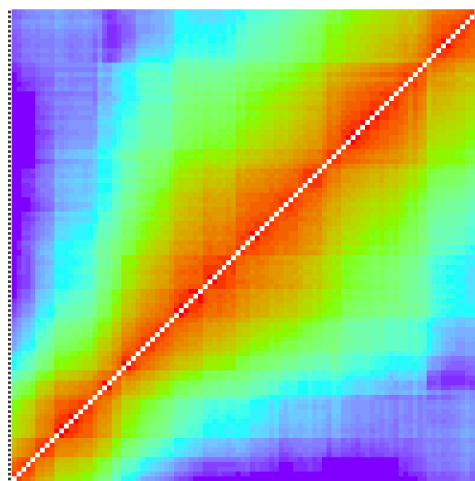

LG8

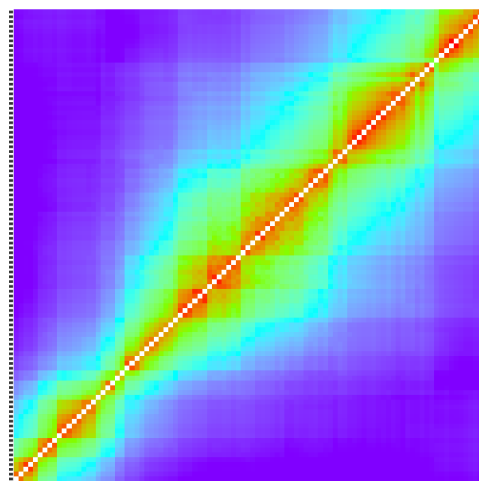

LG9

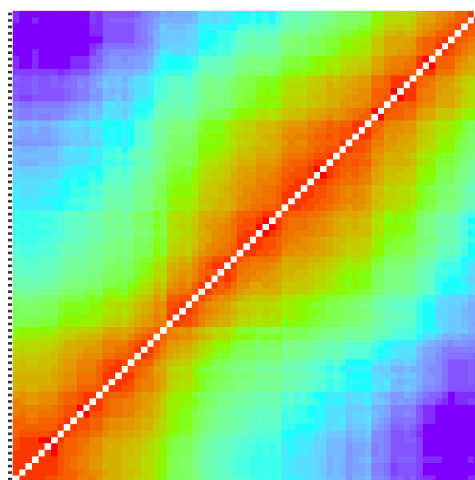

LG9

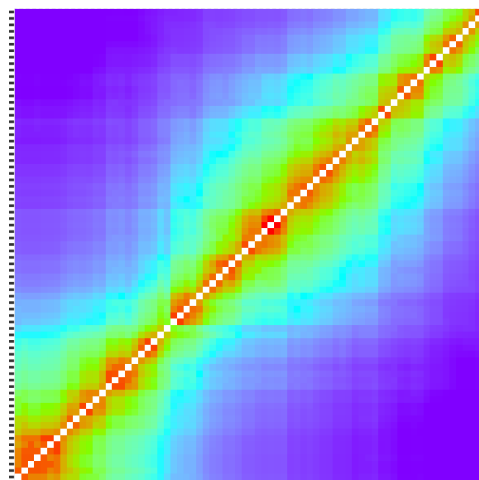



LG10

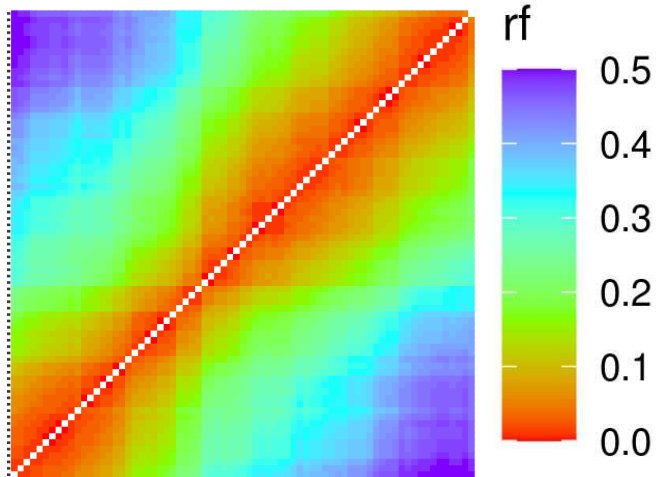

LG10

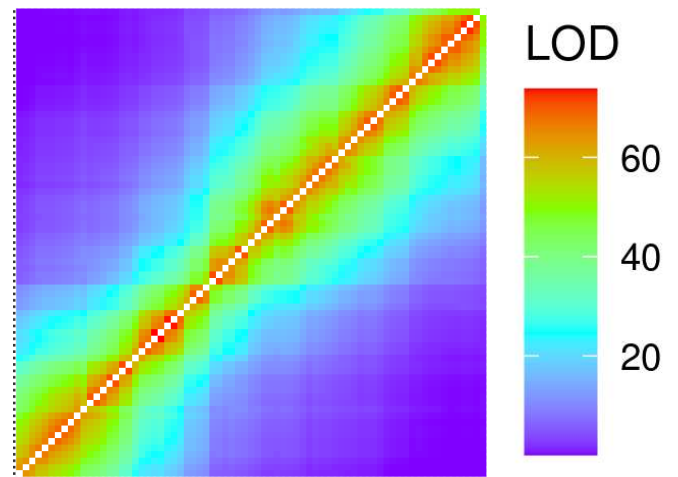

LG11

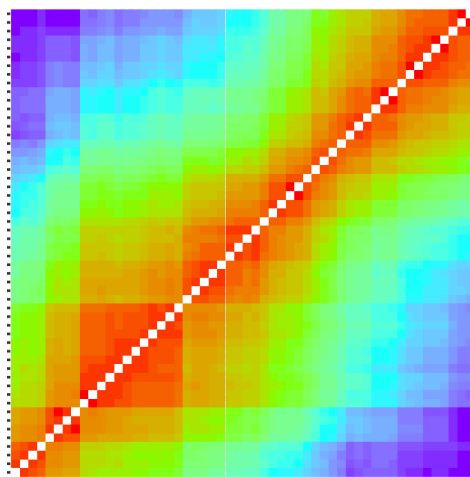

LG11

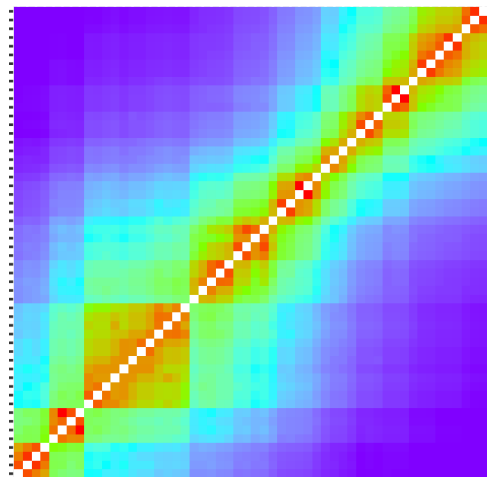

LG12

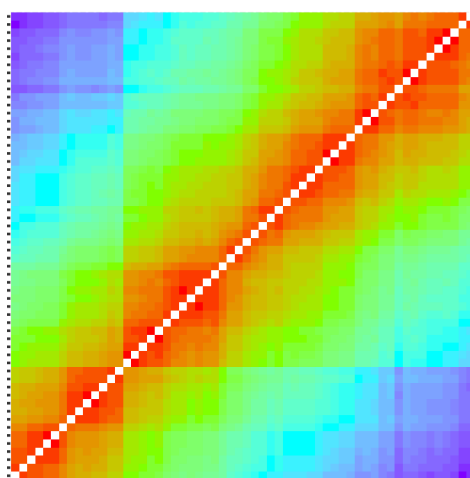

LG12

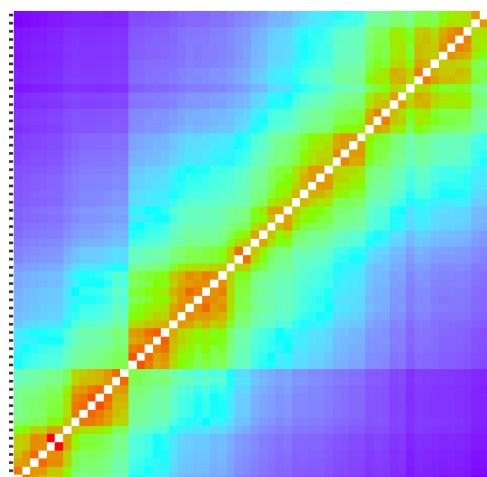

**Figure S9. Pairwise recombination fractions and LOD scores.** Plots on the preceding four pages present the pairwise recombinations fractions (rf, left) and the pairwise LOD scores (right) for all 12 LGs. Data are from the reduced map of 2,022 loci.
